# The creation-mutation-selection model: mutation rates and effective population sizes

Gordon Irlam  
gordoni@gordoni.com

Los Altos, California, United States

July 16, 2023

*[Pre-publication draft – feedback solicited]*

## Abstract

The creation-selection-mutation model makes predictions regarding the fitness of asexual and sexual populations in an environment that incorporates both positive and negative selection. The model predicts the optimal spontaneous mutation rate for a sexual population as one in which the fitness losses associated with positive and negative selection are equal. The model depends upon three mutation related rates: the rate of adaptive mutational opportunities, the rate of negative mutational site creation, and the spontaneous mutation rate. These three mutation related rates are estimated based on a comparison of substitution rates at nonsynonymous and synonymous sites in the genomes of related eukaryotic species. For eukaryotes, the rate of adaptive mutation opportunities is found to typically be in the range  $10^{-3}$  to  $10^{-2}$  population wide adaptive mutational opportunity sites per sexual generation. Negative sites are typically created at the rate  $10^{-1}$  to  $10^1$  sites per haploid genome per sexual generation. And the spontaneous mutation rate is typically in the range  $10^{-9}$  to  $10^{-8}$  spontaneous mutations per creation-mutation-selection model site per sexual generation. Effective population sizes are also computed based on the assumption of optimal mutation rates. That effective population sizes appear reasonable, adds some evidence to the claim that evolution tunes the mutation rate towards a near optimal value.

**Keywords:** adaptive mutation rate, deleterious mutation rate, spontaneous mutation rate, optimal mutation rate.

## Introduction

The creation-selection-mutation model is a mathematical model for the fitness of asexual and sexual populations in the presence of positive and negative selection[1]. The model depends on three mutation related rates: the rate of population wide adaptive mutational opportunity site creation, the per organism rate of negative mutational opportunity site creation, and the spontaneous mutation rate at these sites. Excluding neutral sites, these three rates are denoted  $\Gamma_p^*$ ,  $\Gamma_n^*$ , and  $\mu_{ss}$ , respectively, and are expressed as rates per asexual or sexual generation. For finite genome sizes, there are really only two independent mutation related rates;  $\Gamma_n^*$  is determined by the length of the genome under the control of negative selection and the spontaneous mutation rate.

By comparing substitution rates at nonsynonymous and synonymous sites in the genomes of relatively recently diverged sexual species with a known divergence time and a known time between sexual generations, the three mutation related rates will be estimated. The motivation being with these rates in hand it should then be possible to compute the advantage of sex.

In the creation-selection-mutation model, the optimal spontaneous mutation rate for sexual populations is one for which the fitness losses from positive and negative selection are equal. Too low a mutation rate, and adaptive sites will take too long to fix. Too high a mutation rate, and negative selection will exert a heavy toll. Effective population sizes are computed based on the assumption of optimal mutation rates. For animals, these effective population sizes are found to be eminently reasonable, adding support to the hypothesis that evolution tunes the mutation rate for maximal fitness.

## Results

The aim of this study is to determine the approximate range of the key mutational parameters, not their precise values. For particular species others may have come up with more precise estimates of some of the parameter values, but this is not known to have been previously done with a consistent framework that spans species and parameter values. To simplify things it is assumed spontaneous mutations occur at random across the full length of the genome.

In the creation-selection-mutation model a site is a binary entity that is first created, and subsequently satisfied. This is different from coding sites on the genome, where a site is a base pair that can take on any one of four possible values. Which type of site is being discussed should be obvious from the context.

## Method of parameter estimation

Consider two related species. Let  $A$  and  $S$  denote the number of nonsynonymous and synonymous sites that are either in common between two orthologous genes, or alternatively the coding portions of the genomes, of the two species. Let  $D_n$  and  $D_s$  be the number of nonsynonymous and synonymous substitutions occurring between the two genes or genomes. Let  $K_a = \frac{D_n}{A}$  (also known as  $d_N$ ) and  $K_s = \frac{D_s}{S}$  (also known as  $d_S$ ).

## The spontaneous mutation rate

62

Let  $g$  be the generation time, and  $T$  be the time since the two species diverged. Let  $\mu_{by}$  be the DNA mutation rate for the species per base pair per unit of time. Then the mutation rate per base pair per sexual generation,  $\mu_{bs}$ , is given by,

63  
64  
65

$$\mu_{bs} = \mu_{by}g \quad (1)$$

$\mu_{by}$  can be estimated from the genome wide synonymous mutation rate,

66

$$\mu_{by} = \frac{K_s}{2T} \quad (2)$$

Since there is assumed to be only one correct mutation for a given adaptive mutational opportunity, with the other two mutations leaving the site on average no better and no worse off, the rate of satisfying mutations per sexual generation,  $\mu_{ss}$ , is,

67  
68  
69

$$\begin{aligned} \mu_{ss} &= \frac{1}{3}\mu_{bs} \\ &= \frac{1}{3} \frac{K_s g}{2T} \end{aligned} \quad (3)$$

## Positive selection

70

Let  $\alpha$  be the fraction of nonsynonymous substitutions that are positively selected; as opposed to being neutral nonsynonymous substitutions. In the long run in our model, the rate of site creation is equal to the rate of substitution. Consequently, the per generation rate of site creation is,

71  
72  
73

$$\Gamma_p^* = \alpha \frac{A' K_a g}{2T} \quad (4)$$

where  $A'$  is the value of  $A$  adjusted to take into account nonsynonymous sites in the genome that weren't analyzed.

74  
75

## Estimating alpha

76

It is possible to estimate  $\alpha$ , if, in addition to estimates of the number of substitutions, data on polymorphisms are available[2, 3]. Table 1 shows a sampling of estimates for  $\alpha$ . As can be seen there is considerable variability regarding the value of  $\alpha$ . For animals,  $\alpha$  has an approximate mean value of 0.6 and a standard deviation of 0.2.

77  
78  
79  
80

| Species                                                       | Estimate of $\alpha$ | Year | Source             |
|---------------------------------------------------------------|----------------------|------|--------------------|
| <i>Homo sapiens</i> and old world monkeys                     | 0.35                 | 2001 | [4]                |
| <i>Homo sapiens</i> and <i>Pan troglodytes</i>                | 0.10 - 0.13          | 2007 | [5]                |
| <i>Homo sapiens</i> and <i>Pan troglodytes</i>                | 0.10 - 0.20          | 2008 | [6]                |
| <i>Homo sapiens</i> and macaques                              | 0 or 0.31 - 0.40     | 2009 | [7]                |
| <i>Mus musculus</i> and <i>Mus famulus</i> or <i>Rattus</i>   | 0.57                 | 2010 | [8]                |
| <i>Drosophila simulans</i> and <i>Drosophila yakuba</i>       | 0.45                 | 2002 | [2]                |
| <i>Drosophila melanogaster</i> and <i>Drosophila simulans</i> | 0.29                 | 2007 | [9]                |
| <i>Drosophila americana</i> and <i>Drosophila ezoana</i>      | 0.57                 | 2007 | [10]               |
| <i>Drosophila miranda</i> and <i>Drosophila pseudoobscura</i> | 0.44 - 0.61          | 2008 | [11]               |
| <i>Drosophila melanogaster</i> and <i>Drosophila simulans</i> | 0.52                 | 2009 | [7]                |
| 44 animal species pairs                                       | $0.58 \pm 0.20$      | 2016 | [12][Supplement 1] |
| 9 out of 10 plant species                                     | 0.0                  | 2010 | [13]               |

Table 1: Some estimates of  $\alpha$  the fraction of positively selected nonsynonymous substitutions.

## Negative selection

81

Random deleterious mutations to the genome can be corrected either by purifying selection or back mutation. Back mutation is likely to be rare, so we focus on purifying selection. We model deleterious mutations as occurring at a rate  $\Gamma_n^*$  per organism lineage.

82

83

84

Let  $a_n^*$  be the fraction of nonsynonymous mutations that are truly deleterious. Truly deleterious mutations are both deleterious and non-neutral. Assuming mutations are distributed randomly across sites, this is the same as the fraction of the nonsynonymous coding sites that are being maintained by negative selection. That is, mutations of the nonsynonymous sites are neither neutral nor beneficial. Let  $n_a$  be the fraction of nonsynonymous sites in the fraction of the genome under the control of negative selection.  $n_a$  will be less than 1 if non-coding regions are under the control of negative selection. The per generation rate at which deleterious mutations are occurring is given by,

85

86

87

88

89

90

91

92

$$\begin{aligned} \Gamma_n^* &= \frac{a_n^* A' \mu_{by} g}{n_a} \\ &= \frac{a_n^* A' K_s g}{2n_a T} \text{ by equation 2} \end{aligned} \quad (5)$$

## Estimating the nonsynonymous deleterious mutation fraction

93

To compute  $\Gamma_n$ , we need to come up with an estimate for  $a_n^*$ , the fraction of nonsynonymous mutations that are truly deleterious.

94

95

Let  $a_p^*$  be the fraction of nonsynonymous mutations that are truly beneficial. Let  $N$  be the population size. Let  $E_{mut}[s_p^*]$  be the mean selection coefficient for new true positive mutations. For a sexual population in the creation-mutation-selection model, the fixation probability of new mu-

96

97

98

tations is approximately equal to the selection coefficient[1]. Consequently the rate of fixation of 99  
 beneficial mutations per unit time for a particular site is  $N a_p^* \mu_{by} E_{mut}[s_p^*]$ . The beneficial fixation 100  
 rate for a particular site is also  $\frac{\alpha K_a}{2T}$ . Consequently, 101

$$\begin{aligned} a_p^* &= \frac{\alpha K_a}{2T \mu_{by} N E_{mut}[s_p^*]} \\ &= \frac{\alpha K_a}{K_s N E_{mut}[s_p^*]} \text{ by equation 2} \end{aligned} \quad (6)$$

$\alpha$  and  $\frac{K_a}{K_s}$  are both less than 1. Some theoretical and experimental work suggests the distribution 102  
 of fitness effects of new beneficial mutations is exponential with small fitness effect mutations 103  
 being more common than large effect mutations[14, 15], while other experimental work rejects 104  
 this hypothesis and suggests fitness effects might follow a normal distribution[16, 17]. For the 105  
 exponential distribution a mean fitness effect of 0.087 has been reported[15]. This was for asexual 106  
 bacteria. For sexual eukaryotes with their larger genomes, the mean fitness effect might be quite 107  
 a bit smaller, but even then, given the impact of  $N$  in equation 6,  $a_p^*$  is likely to be very close to 108  
 zero. For a normal distribution the mean fitness effect is likely to be larger, making  $a_p^*$  even closer 109  
 to zero. 110

$$a_p^* \approx 0$$

The fraction of nonsynonymous substitutions that are neutral is  $1 - \alpha$ , and neutral substitutions 111  
 occur at the rate  $\frac{K_a}{2T}$ , giving a per site nonsynonymous neutral substitution rate,  $k$ , 112

$$k = (1 - \alpha) \frac{K_a}{2T}$$

Let the fraction of nonsynonymous mutations that are neutral be  $a_0$ . According to the neutral 113  
 theory, the neutral mutation rate is equal to the neutral substitution rate[18], 114

$$\begin{aligned} a_0 \mu_{by} &= k \\ a_0 &= (1 - \alpha) \frac{K_a}{K_s} \text{ by equation 2} \end{aligned}$$

Since mutations are either true positives, true negatives, or neutral, 115

$$\begin{aligned} a_p^* + a_n^* + a_0 &= 1 \\ a_n^* &\approx 1 - (1 - \alpha) \frac{K_a}{K_s} \end{aligned} \quad (7)$$

Over an entire genome  $\frac{K_a}{K_s}$  will almost certainly be less than 1. It follows then that  $a_n^*$  will be 116  
 greater than  $\alpha$ . 117

| Species                                                  | Lesser genes | Genes aligned | $A$               | $K_a$  | $K_s$ | $\frac{K_a}{K_s}$ | $A'$              |
|----------------------------------------------------------|--------------|---------------|-------------------|--------|-------|-------------------|-------------------|
| <i>Homo sapiens</i> and <i>Pan troglodytes</i>           | 19,932       | 17,678        | $2.2 \times 10^7$ | 0.0034 | 0.014 | 0.25              | $2.7 \times 10^7$ |
| <i>Mus musculus</i> and <i>Rattus norvegicus</i>         | 22,517       | 18,162        | $2.2 \times 10^7$ | 0.031  | 0.19  | 0.16              | $2.7 \times 10^7$ |
| <i>Gallus gallus</i> and <i>Phasianus colchicus</i>      | 16,248       | 14,312        | $1.9 \times 10^7$ | 0.017  | 0.11  | 0.16              | $2.1 \times 10^7$ |
| <i>Xenopus laevis</i> and <i>Xenopus tropicalis</i>      | 21,885       | 17,864        | $2.3 \times 10^7$ | 0.049  | 0.29  | 0.17              | $2.8 \times 10^7$ |
| <i>Oryzias latipes</i> and <i>Nothobranchius furzeri</i> | 22,145       | 17,031        | $2.2 \times 10^7$ | 0.11   | 0.98  | 0.11              | $2.9 \times 10^7$ |
| <i>Drosophila simulans</i> and <i>Drosophila yakuba</i>  | 14,217       | 12,854        | $1.6 \times 10^7$ | 0.035  | 0.29  | 0.12              | $1.8 \times 10^7$ |
| <i>Plasmodium vivax</i> and <i>Plasmodium gonderi</i>    | 5,389        | 3,343         | $3.1 \times 10^6$ | 0.15   | 4.17  | 0.035             | $8.3 \times 10^6$ |
| <i>Arabidopsis thaliana</i> and <i>Camelina sativa</i>   | 27,271       | 21,557        | $2.0 \times 10^7$ | 0.055  | 0.27  | 0.20              | $2.5 \times 10^7$ |
| <i>Elaeis guineensis</i> and <i>Cocos nucifera</i>       | 26,295       | 16,665        | $1.6 \times 10^7$ | 0.033  | 0.11  | 0.30              | $2.4 \times 10^7$ |
| <i>Populus trichocarpa</i> and <i>Hevea brasiliensis</i> | 31,543       | 15,327        | $1.5 \times 10^7$ | 0.13   | 0.74  | 0.17              | $3.3 \times 10^7$ |

Table 2: Genome wide estimates of coding sites and substitution rates. Lesser genes is the lesser number of genes of the two species.  $A$  is the numbers of nonsynonymous sites.  $K_a$  and  $K_s$  are the number of substitutions per nonsynonymous and synonymous site respectively.  $A'$  is the number of nonsynonymous sites adjusted for genes and segments of genes that weren't analyzed.

## Parameter estimation

118

## Comparison of genomes

119

To estimate  $\Gamma_p^*$ ,  $\Gamma_n^*$ , and  $\mu_{ss}$ , a number of relatively recently diverged species pairs were chosen. Species were selected based on the availability of sequenced genomes, availability of estimates of divergence times, and availability of organism generation times. The pairs need to have diverged relatively recently so that the average generation time is meaningful. It is assumed that the number of within species polymorphisms is small in comparison to the number of between species substitutions, so that all differences between genomes can be considered to represent substitutions. Many of the selected species are model organisms. Model organisms are often proposed on the basis of their short generation times. This might introduce a slight bias leading to underestimates of typical values for  $\Gamma_p^*$ ,  $\Gamma_n^*$ , and  $\mu_{ss}$ .

120

121

122

123

124

125

126

127

128

For each species pair orthologous genes were identified using protein-protein BLAST to determine reciprocal best hits. Protein sequences of orthologous genes were then aligned using the Needleman-Wunsch algorithm. Aligned protein sequences were mapped back to aligned nucleotide sequences. Genes containing tandem repeat regions were excluded. Estimates of  $A$ ,  $S$ ,  $K_a$ , and  $K_s$  for each gene pair were made. Genome wide estimates of  $A$  and  $S$  were computed as the sums of individual gene pairs, and genome wide estimates of  $K_a$  and  $K_s$  computed as  $A$  and  $S$  weighted averages of the values of the individual gene pairs. Estimates of  $\Gamma_p^*$ ,  $\Gamma_n^*$ , and  $\mu_{ss}$  are likely underestimates on account of regions of the genome with the greatest variability not aligning and being excluded from the analysis. This becomes increasingly significant for longer divergence times. See Materials and methods for a more detailed description of the methodology. The results are shown in Table 2.

129

130

131

132

133

134

135

136

137

138

The  $K_a$  and  $K_s$  values for humans and chimps of 0.0034 and 0.014 compare reasonably well to previously reported values of 0.0029 and 0.013 respectively[19][Supplement S23, site weighted  $K_a$  and  $K_s$  values divided by  $2T$ ].

139

140

141

To account for unanalyzed genes the value of  $A$  was multiplied by the smaller of the coding sequence sizes for the two species divided by the analyzed coding sequence size giving  $A'$ . Use of the smaller

142

143

coding sequence size is important because while most analyzed species are diploid, *Xenopus laevis* is tetraploid[20], and *Camelina sativa* is hexaploid[21].

## Estimating the nonsynonymous fraction in the fraction of the genome under the control of negative selection

To compute  $\Gamma_n^*$  we need to estimate  $n_a$ , the fraction of nonsynonymous sites in the fraction of the genome under the control of negative selection.

Let  $L$  be the length of the genome in base pairs, and  $l_n$  be the fraction of  $L$  under the control of negative selection. In theory  $n_a$  can be computed from,

$$\begin{aligned} a_n^* A' &= n_a l_n L \\ n_a &= \frac{a_n^* A'}{l_n L} \end{aligned} \quad (8)$$

For humans and chimps  $\frac{K_a}{K_s} = 0.25$ , and from Table 1,  $\alpha \approx 0.15$  leading by equation 7 to  $a_n^* = 0.79$ . For humans  $l_n = 0.054$ [22],  $L = 3.1 \times 10^9$ , and  $A' = 2.7 \times 10^7$ . By equation 8 this results in a value for  $n_a$  of 0.13. For many other species  $l_n$  is unknown. Not knowing any better, we assume that the same value of  $n_a$  applies for most other species.

*Plasmodium* spp. have very small compact genomes,  $L = 3.0 \times 10^7$ .  $\frac{K_a}{K_s} = 0.035$ , so assuming  $\alpha = 0.58$ , gives  $a_n^* = 0.99$ .  $A' = 8.3 \times 10^6$ , implies  $n_a l_n = 0.27$ , which if  $n_a = 0.13$  implying  $l_n > 1$ , which is impossible. We naively assume  $n_a = l_n = 0.52$  for *Plasmodium* spp.

## Calculation of the mutation related rates

Using equation 7 it is possible to compute estimates for  $a_n^*$ . Estimates of  $\alpha$  are based on Table 1, except that for plants we assume an  $\alpha$  of 0.1 rather than the somewhat implausible value of 0.0. An  $\alpha$  of 0.1 appears within the 95% confidence interval of 8 of the 10 plants reported by Gossmann et al.[13]. Using equations 4, 5, and 3, it is then possible to compute estimates for  $\Gamma_p^*$ ,  $\Gamma_n^*$ , and  $\mu_{ss}$ . The results are presented in Table 3.

For the considered species pairs excluding plants,  $\Gamma_p^*$  is in the range 0.0012 to 0.026, or roughly  $10^{-3}$  to  $10^{-2}$ .  $\Gamma_n^*$  is in the range 0.16 to 4.2, or roughly  $10^{-1}$  to  $10^1$ . And  $\mu_{ss}$  ranges from  $4.3 \times 10^{-10}$  to  $1.3 \times 10^{-8}$ , or roughly  $10^{-9}$  to  $10^{-8}$ .

The estimate  $\Gamma_p^* = 0.0012$  for *Drosophila simulans* and *Drosophila yakuba* can be compared to a published estimate of a rate of adaptive substitution of 0.0022 for the same species based on an analysis of 35 genes[2].

Table 4 shows  $\frac{\Gamma_p^*}{g}$ , the rate of adaptive site creation per unit time,  $\mu_{bs}$ , the rate of spontaneous mutation per base pair sexual generation, and  $\mu_{by}$ , the rate of spontaneous mutation per base pair per unit time.

| Species                                                  | $T$                | $g$  | $\alpha$ | $n_a$ | $a_n^*$ | $\Gamma_p^*$ | $\Gamma_n^*$ | $\mu_{ss}$            |
|----------------------------------------------------------|--------------------|------|----------|-------|---------|--------------|--------------|-----------------------|
| <i>Homo sapiens</i> and <i>Pan troglodytes</i>           | $6.7 \times 10^6$  | 25   | 0.15     | 0.13  | 0.79    | 0.026        | 4.2          | $8.5 \times 10^{-9}$  |
| <i>Mus musculus</i> and <i>Rattus norvegicus</i>         | $20.9 \times 10^6$ | 0.5  | 0.57     | 0.13  | 0.93    | 0.0057       | 0.45         | $7.7 \times 10^{-10}$ |
| <i>Gallus gallus</i> and <i>Phasianus colchicus</i>      | $34.1 \times 10^6$ | 1    | 0.58     | 0.13  | 0.93    | 0.0030       | 0.24         | $5.3 \times 10^{-10}$ |
| <i>Xenopus laevis</i> and <i>Xenopus tropicalis</i>      | $64.0 \times 10^6$ | 3    | 0.58     | 0.13  | 0.93    | 0.019        | 1.4          | $2.3 \times 10^{-9}$  |
| <i>Oryzias latipes</i> and <i>Nothobranchius furzeri</i> | $93.0 \times 10^6$ | 1.5  | 0.58     | 0.13  | 0.95    | 0.015        | 1.7          | $2.6 \times 10^{-9}$  |
| <i>Drosophila simulans</i> and <i>Drosophila yakuba</i>  | $11.4 \times 10^6$ | 0.1  | 0.45     | 0.13  | 0.93    | 0.0012       | 0.16         | $4.3 \times 10^{-10}$ |
| <i>Plasmodium vivax</i> and <i>Plasmodium gonderi</i>    | $9.5 \times 10^6$  | 0.18 | 0.58     | 0.52  | 0.99    | 0.0068       | 0.62         | $1.3 \times 10^{-8}$  |
| <i>Arabidopsis thaliana</i> and <i>Camelina sativa</i>   | $9.4 \times 10^6$  | 0.2  | 0.10     | 0.13  | 0.82    | 0.0015       | 0.46         | $9.7 \times 10^{-10}$ |
| <i>Elaeis guineensis</i> and <i>Cocos nucifera</i>       | $43.0 \times 10^6$ | 50   | 0.10     | 0.13  | 0.73    | 0.046        | 8.7          | $2.2 \times 10^{-8}$  |
| <i>Populus trichocarpa</i> and <i>Hevea brasiliensis</i> | $80.0 \times 10^6$ | 25   | 0.10     | 0.13  | 0.85    | 0.066        | 25           | $3.9 \times 10^{-8}$  |

Table 3: Estimates of  $a_n^*$  and mutation related rates.  $T$  is the time since the species diverged in years.  $g$  is the estimated generation time in years.  $\alpha$  is the proportion of substitutions that are adaptive.  $n_a$  is the fraction of nonsynonymous sites in the fraction of the genome under negative selection.  $a_n^*$  is the proportion of nonsynonymous coding sites that are maintained by negative selection.  $\Gamma_p^*$  is the rate of true positive site creation per generation.  $\Gamma_n^*$  is the rate of true negative site creation per haploid genome per generation.  $\mu_{ss}$  is the rate of mutation per creation-mutation-selection model site per generation.

| Species                                                  | $\frac{\Gamma_p^*}{g}$ | $\mu_{bs}$           | $\mu_{by}$           | $N_e$             |
|----------------------------------------------------------|------------------------|----------------------|----------------------|-------------------|
| <i>Homo sapiens</i> and <i>Pan troglodytes</i>           | 0.0010                 | $2.5 \times 10^{-8}$ | $1.0 \times 10^{-9}$ | $7.4 \times 10^5$ |
| <i>Mus musculus</i> and <i>Rattus norvegicus</i>         | 0.0115                 | $2.3 \times 10^{-9}$ | $4.6 \times 10^{-9}$ | $1.7 \times 10^7$ |
| <i>Gallus gallus</i> and <i>Phasianus colchicus</i>      | 0.0030                 | $1.6 \times 10^{-9}$ | $1.6 \times 10^{-9}$ | $2.4 \times 10^7$ |
| <i>Xenopus laevis</i> and <i>Xenopus tropicalis</i>      | 0.0063                 | $6.9 \times 10^{-9}$ | $2.3 \times 10^{-9}$ | $5.9 \times 10^6$ |
| <i>Oryzias latipes</i> and <i>Nothobranchius furzeri</i> | 0.0101                 | $7.9 \times 10^{-9}$ | $5.2 \times 10^{-9}$ | $3.4 \times 10^6$ |
| <i>Drosophila simulans</i> and <i>Drosophila yakuba</i>  | 0.0122                 | $1.3 \times 10^{-9}$ | $1.3 \times 10^{-8}$ | $1.7 \times 10^7$ |
| <i>Plasmodium vivax</i> and <i>Plasmodium gonderi</i>    | 0.0375                 | $4.0 \times 10^{-8}$ | $2.2 \times 10^{-7}$ | $8.2 \times 10^5$ |
| <i>Arabidopsis thaliana</i> and <i>Camelina sativa</i>   | 0.0074                 | $2.9 \times 10^{-9}$ | $1.5 \times 10^{-8}$ | $3.3 \times 10^6$ |
| <i>Elaeis guineensis</i> and <i>Cocos nucifera</i>       | 0.0009                 | $6.5 \times 10^{-8}$ | $1.3 \times 10^{-9}$ | $2.5 \times 10^5$ |
| <i>Populus trichocarpa</i> and <i>Hevea brasiliensis</i> | 0.0026                 | $1.2 \times 10^{-7}$ | $4.6 \times 10^{-9}$ | $6.8 \times 10^4$ |

Table 4: Estimates of additional parameters.  $\frac{\Gamma_p^*}{g}$  is the rate of true positive site creation per year.  $\mu_{bs}$  is the rate of mutation per base pair per sexual generation.  $\mu_{by}$  is the rate of mutation per base pair per year.  $N_e$  is the effective population size assuming the optimal mutation rate.



| Species                        | $\mu_{bs}$           | Source                   |
|--------------------------------|----------------------|--------------------------|
| <i>Homo sapiens</i>            | $2.0 \times 10^{-8}$ | [27][Table 4, $C\mu_b$ ] |
| <i>Homo sapiens</i>            | $2.5 \times 10^{-8}$ | [28]                     |
| <i>Mus musculus</i>            | $3.8 \times 10^{-9}$ | [29]                     |
| <i>Mus musculus</i>            | $5.7 \times 10^{-9}$ | [30][mean value]         |
| <i>Mus musculus</i>            | $1.1 \times 10^{-8}$ | [27][Table 4, $C\mu_b$ ] |
| <i>Drosophila melanogaster</i> | $2.8 \times 10^{-9}$ | [31]                     |
| <i>Drosophila melanogaster</i> | $3.5 \times 10^{-9}$ | [32]                     |
| <i>Drosophila melanogaster</i> | $8.5 \times 10^{-9}$ | [27][Table 4, $C\mu_b$ ] |

Table 5: Estimates of the spontaneous mutation rate,  $\mu_{bs}$ , by various authors.  $\mu_{bs}$  is the rate of mutation per base pair per sexual generation.

The rate of adaptive site creation roughly ranges from one every thirty years to one every thousand years. 174  
175

*Plasmodium* has a very high spontaneous mutation rate per sexual generation. The average mutation rate is reported elsewhere to be  $1.7 \times 10^{-9}$  per generation[23]. However, the *Plasmodium* life cycle involves at least 200 generations per year[24] but only one sexual generation every 65 days[25]. This would imply a spontaneous mutation rate per sexual generation of at least  $6.1 \times 10^{-8}$  and a spontaneous mutation rate per year of  $3.4 \times 10^{-7}$ . This compares to the estimates made here of  $4.0 \times 10^{-8}$  and  $2.2 \times 10^{-7}$  respectively. This high rate of spontaneous mutation may go some way to explaining why *Plasmodium* is able to rapidly evolve drug resistance[26]. 176  
177  
178  
179  
180  
181  
182

$\mu_{bs}$  roughly ranges from  $10^{-9}$  to  $10^{-7}$ . Some of the reported mutation rates can be compared to estimates reported by others as shown in Table 5. While similar in magnitude, a discrepancy of more than a factor of two exists between the estimate made here and the lowest value reported by others for *Drosophila* spp. 183  
184  
185  
186

Excluding *Plasmodium*,  $\mu_{by}$  roughly ranges from  $10^{-9}$  to  $10^{-8}$ . 187

## Effective population sizes assuming optimal mutation rates 188

Even though deleterious mutations appear to occur per genome at roughly one hundred times the rate of adaptive mutational opportunities, deleterious mutations have a more fleeting existence because alleles to satisfy them already exist in the population, and so they each individually exert a smaller fitness cost. 189  
190  
191  
192

Assuming evolution drives spontaneous mutation rates towards the value that produces the maximum population fitness, the fitness losses coming from positive selection will exactly equal those coming from negative selection[1]. Then the optimal mutation rate is given by[1], 193  
194  
195

$$\mu_{bs} \approx \frac{3\Gamma_p^*}{N\Gamma_n^*} \quad (9)$$

This equation can be trivially rearranged to give  $N_e$ , the effective population size implied by  $\mu_{bs}$ ,  $\Gamma_p^*$ , and  $\Gamma_n^*$ , assuming the optimal per site mutation rate. 196  
197

$$N_e \approx \frac{3\Gamma_p^*}{\Gamma_n^* \mu_{bs}}$$

Using equations 2, 1, 4, and 5. 198

$$N_e \approx \frac{6\alpha n_a K_a T}{a_n^* K_s^2 g} \quad (10)$$

The resulting estimates of  $N_e$ , computed using 10 are shown in Table 4. 199

If the hypothesis that spontaneous mutation rates are evolutionarily tuned towards producing a fitness level that maximizes the ability to adapt by positive selection while minimizing the cost of negative selection was false we could get any sorts of random values out of equation 10. We don't. Most of the values appear eminently reasonable. Thus the hypothesis appears to be a reasonably good hypothesis. 200  
201  
202  
203  
204

The effective population for *Plasmodium* spp. is  $8.2 \times 10^5$ , which may on first glance appear smaller than expected, and much smaller than the actual population, but it must be remembered that *Plasmodium* undergoes a severe population bottleneck every time it is transmitted from host to host. Another way of looking at things is a small effective population size and a small size of the portion of the genome under the control of negative selection explains why *Plasmodium* has such a high rate of spontaneous mutation. These two terms appear as the denominator in the formula for the optimal mutation rate[1], 205  
206  
207  
208  
209  
210  
211

$$\mu_{bs} \approx \sqrt{\frac{3\Gamma_p^*}{N l_n L}}$$

The effective population size for *Elaeis guineensis* (African oil palm) and *Cocos nucifera* (coconut palm), and *Populus trichocarpa* (black cottonwood tree) and *Hevea brasiliensis* (rubber tree) are small. This may be because the fixed physical location of plants might limit the extent of random mating. Or perhaps something unexplained is going on with plants; they also reportedly have low values for  $\alpha$ . 212  
213  
214  
215  
216

## Discussion 217

Genomic analysis suggests that for sexual species  $\Gamma_p^*$  is typically in the range  $10^{-3}$  to  $10^{-2}$  population wide adaptive mutational opportunity sites per sexual generation.  $\Gamma_n^*$  is typically in the range  $10^{-1}$  to  $10^1$  negative sites per haploid genome per sexual generation. And  $\mu_{ss}$  is typically in the range  $10^{-9}$  to  $10^{-8}$  spontaneous mutations per creation-mutation-selection model site per sexual generation. This is the area of the parameter space of interest when seeking to assess the advantage of sex. 218  
219  
220  
221  
222  
223

For animals effective population sizes computed under the assumption of optimal mutation rates appear eminently reasonable, suggesting that evolution tunes the spontaneous mutation rate to produce optimal fitness. Whether this also applies to plants isn't clear.

## Materials and methods

See Supplement 1 for the bioinformatics analysis code and results of the gene by gene analysis of each species pair[33].

The coding sequence (CDS) of genes from sequenced species genomes were obtained from NCBI. Genomes were filtered to remove any non-nuclear genes, documented pseudogenes, or duplicate protein isoforms. At this stage multiple distinct protein isoforms of each gene were potentially present. This is important. When seeking to assess the divergence of closely related genomes, filtering out shorter isoforms of each gene might have resulted in the longest isoform of orthologous genes in each species having few exons directly in common but still being related. This would have led to undercounting of orthologous sites and misestimating substitution rates.

Reciprocal best hits were computed using protein-protein BLAST[34] using the task blastp-fast, the BLOSUM90 matrix, soft masking of low complexity regions, a minimum expect value of  $10^{-6}$ , and reporting the single best high-scoring segment pair. For each gene of the first species having multiple isoforms with reciprocal best hits, the reciprocal best hit of the isoform with the highest number of matching residues was then selected to represent an orthologous gene pair.

Protein sequences were aligned to each other using the Needleman-Wunsch[35] algorithm implemented by Biopython PairwiseAligner[36]. Scores of match 5, mismatch -8, gap open -50, end gap open -25, gap extend -2, and end gap extend -1, were found to do a good job of conservatively predicting the alignments for most orthologous gene pairs examined. Nucleotide sequences were then aligned based on the protein sequences. Stop residues '\*', unknown nucleotides 'X', and leading gaps '-' were not aligned, but the remainder of the protein sequence was aligned.

Mutation rates may vary over the genome. For each orthologous gene pair PAML's CODEML[37] was used to count the number of synonymous and nonsynonymous sites and estimate the number of substitutions that have occurred. Rarely CODEML failed to deliver a result within its search bounds, producing an estimate of 50.0 for the separation time. Such results were excluded from the analysis.

Genes containing tandem repeats may bias the analysis due to tandem repeat copy number polymorphism and random gene conversion within such genes. So Tandem Repeat Finder[38] was used on the nucleotide sequence to exclude such genes from the analysis. Default recommended parameter values were used, match 2, mismatch 7, delta (indels) 7, PM 80, PI 10, minscore 50, except maxperiod was increased from 500 to 2,000 to ensure identifying the human FLG gene which has repeats of period 972.

Estimates of  $K_a$  and  $K_s$  are highly variable for small numbers of residues. Only genes having an aligned protein length of 20 residues or more with a Tandem Repeat Finder score of 100 or less were selected for inclusion in the resulting analysis. A score of more than 100 corresponds to more than 16 residues making up any discovered total tandem repeat region length.

| Species                       | Accession        |
|-------------------------------|------------------|
| <i>Homo sapiens</i>           | GCF_000001405.39 |
| <i>Pan troglodytes</i>        | GCF_002880755.1  |
| <i>Mus musculus</i>           | GCF_000001635.27 |
| <i>Rattus norvegicus</i>      | GCF_015227675.2  |
| <i>Gallus gallus</i>          | GCF_000002315.5  |
| <i>Phasianus colchicus</i>    | GCF_004143745.1  |
| <i>Xenopus tropicalis</i>     | GCF_000004195.4  |
| <i>Xenopus laevis</i>         | GCF_017654675.1  |
| <i>Oryzias latipes</i>        | GCF_002234675.1  |
| <i>Nothobranchius furzeri</i> | GCF_001465895.1  |
| <i>Drosophila simulans</i>    | GCF_016746395.2  |
| <i>Drosophila yakuba</i>      | GCF_016746365.2  |
| <i>Plasmodium vivax</i>       | GCF_000002415.2  |
| <i>Plasmodium gonderi</i>     | GCF_002157705.1  |
| <i>Arabidopsis thaliana</i>   | GCF_000001735.4  |
| <i>Camelina sativa</i>        | GCF_000633955.1  |
| <i>Elaeis guineensis</i>      | GCF_000442705.1  |
| <i>Cocos nucifera</i>         | GCA_008124465.1  |
| <i>Populus trichocarpa</i>    | GCF_000002775.4  |
| <i>Hevea brasiliensis</i>     | GCF_001654055.1  |

Table 6: Accession numbers of genomes used in this study.

Genome wide estimates of  $A$  and  $S$  were produced by summing the individual gene values.  $K_a$  and  $K_s$  for the genome were computed as the  $A$  and  $S$  weighted averages of the individual gene values.

Divergence times were estimated using TimeTree[39].

Noting that laboratory lifespans are typically longer than wild lifespans, generation times were estimated as follows. *Homo sapiens* and *Pan troglodytes*, 25 years[40]. *Mus musculus* and *Rattus norvegicus*, 6 months based on reproductive life spans of 7 to 8 months and 12 to 15 months respectively. *Gallus gallus* and *Phasianus colchicus*, 1 year for *Gallus*[41]. *Xenopus laevis* and *Xenopus tropicalis*, 3 years based on sexual maturity of 12 to 18 months and 4 to 6 months and laboratory lifespans of 10 to 15 years and 10 years respectively[42, 43, 44]. *Oryzias latipes* and *Nothobranchius furzeri*, 1.5 years, based on 50% laboratory mortality after 3 years and exactly 1 year respectively[45, 46]. *Drosophila simulans* and *Drosophila yakuba*, 0.1 years[2]. *Plasmodium vivax* and *Plasmodium gonderi* 65 days, based on *Plasmodium falciparum* and *Plasmodium reichenowi*[25]. *Arabidopsis thaliana* and *Camelina sativa* 0.2 year, based on a life cycle of as little as 6 weeks and a crop season of 85-100 days respectively. *Elaeis guineensis* and *Cocos nucifera* 50 years, based on economic lifespan of 30 years and lifespan of 100 years or more and a lifespan of 80 to 100 years respectively. *Populus trichocarpa* and *Hevea brasiliensis* 25 years, based on being suitable for timber production after 25 years and an economic life of 25 years respectively[47]. It should be noted that *P. trichocarpa* and *H. brasiliensis* are both Malpighiales, but so are annuals of the genus *Viola*. If the ancestors of these trees were short lived, the generation time would be much smaller.

Accession numbers of genomes used in this study are shown in Table 6.

## Conflict of interest disclosure

284

The author declares they have no financial conflicts of interest in relation to the content of this manuscript.

285

286

## Supplements

287

[Supplement 1](#) - Mutation rate analysis software and results.

288

<https://doi.org/10.5281/zenodo.8080182>

289

## References

- [1] Gordon Irlam. The creation-mutation-selection model: the model and mathematical analysis. *BioRxiv*, 2023. doi:10.1101/2023.06.26.546616. 290-292
- [2] Nick GC Smith and Adam Eyre-Walker. Adaptive protein evolution in *Drosophila*. *Nature*, 415(6875):1022–1024, 2002. 293-294
- [3] Ana Filipa Moutinho, Thomas Bataillon, and Julien Y Dutheil. Variation of the adaptive substitution rate between species and within genomes. *Evolutionary Ecology*, 34(3):315–338, 2020. 295-297
- [4] Justin C Fay, Gerald J Wyckoff, and Chung-I Wu. Positive and negative selection on the human genome. *Genetics*, 158(3):1227–1234, 2001. 298-299
- [5] Jun Gojobori, Hua Tang, Joshua M Akey, and Chung-I Wu. Adaptive evolution in humans revealed by the negative correlation between the polymorphism and fixation phases of evolution. *Proceedings of the National Academy of Sciences*, 104(10):3907–3912, 2007. 300-302
- [6] Adam R Boyko, Scott H Williamson, Amit R Indap, Jeremiah D Degenhardt, Ryan D Hernandez, Kirk E Lohmueller, Mark D Adams, Steffen Schmidt, John J Sninsky, Shamil R Sunyaev, et al. Assessing the evolutionary impact of amino acid mutations in the human genome. *PLoS Genetics*, 4(5):e1000083, 2008. 303-306
- [7] Adam Eyre-Walker and Peter D Keightley. Estimating the rate of adaptive molecular evolution in the presence of slightly deleterious mutations and population size change. *Molecular Biology and Evolution*, 26(9):2097–2108, 2009. 307-309
- [8] Daniel L Halligan, Fiona Oliver, Adam Eyre-Walker, Bettina Harr, and Peter D Keightley. Evidence for pervasive adaptive protein evolution in wild mice. *PLoS Genetics*, 6(1):e1000825, 2010. 310-312
- [9] Joshua A Shapiro, Wei Huang, Chenhui Zhang, Melissa J Hubisz, Jian Lu, David A Turissini, Shu Fang, Hung-Yi Wang, Richard R Hudson, Rasmus Nielsen, et al. Adaptive genic evolution in the *Drosophila* genomes. *Proceedings of the National Academy of Sciences*, 104(7):2271–2276, 2007. 313-316
- [10] Xulio Maside and Brian Charlesworth. Patterns of molecular variation and evolution in *Drosophila americana* and its relatives. *Genetics*, 176(4):2293–2305, 2007. 317-318
- [11] Doris Bachtrog. Similar rates of protein adaptation in *Drosophila miranda* and *D. melanogaster*, two species with different current effective population sizes. *BMC Evolutionary Biology*, 8(1):1–14, 2008. 319-321
- [12] Nicolas Galtier. Adaptive protein evolution in animals and the effective population size hypothesis. *PLoS Genetics*, 12(1):e1005774, 2016. 322-323
- [13] Toni I Gossmann, Bao-Hua Song, Aaron J Windsor, Thomas Mitchell-Olds, Christopher J Dixon, Maxim V Kapralov, Dmitry A Filatov, and Adam Eyre-Walker. Genome wide analyses reveal little evidence for adaptive evolution in many plant species. *Molecular Biology and Evolution*, 27(8):1822–1832, 2010. 324-326

- [14] H Allen Orr. The distribution of fitness effects among beneficial mutations. *Genetics*, 163(4):1519–1526, 2003. 328  
329
- [15] Rees Kassen and Thomas Bataillon. Distribution of fitness effects among beneficial mutations before selection in experimental populations of bacteria. *Nature Genetics*, 38(4):484–488, 2006. 330  
331
- [16] Darin R Rokyta, Craig J Beisel, Paul Joyce, Martin T Ferris, Christina L Burch, and Holly A Wichman. Beneficial fitness effects are not exponential for two viruses. *Journal of Molecular Evolution*, 67(4):368, 2008. 332  
333  
334
- [17] Michael J McDonald, Tim F Cooper, Hubertus JE Beaumont, and Paul B Rainey. The distribution of fitness effects of new beneficial mutations in *Pseudomonas fluorescens*. *Biology Letters*, 7(1):98–100, 2011. 335  
336  
337
- [18] Motoo Kimura. *The neutral theory of molecular evolution*. Cambridge University Press, 1983. 338
- [19] The Chimpanzee Sequencing and Analysis Consortium. Initial sequence of the chimpanzee genome and comparison with the human genome. *Nature*, 437(7055):69–87, 2005. 339  
340
- [20] Adam M Session, Yoshinobu Uno, Taejoon Kwon, Jarrod A Chapman, Atsushi Toyoda, Shuji Takahashi, Akimasa Fukui, Akira Hikosaka, Atsushi Suzuki, Mariko Kondo, et al. Genome evolution in the allotetraploid frog *Xenopus laevis*. *Nature*, 538(7625):336–343, 2016. 341  
342  
343
- [21] Sateesh Kagale, Chushin Koh, John Nixon, Venkatesh Bollina, Wayne E Clarke, Reetu Tuteja, Charles Spillane, Stephen J Robinson, Matthew G Links, Carling Clarke, et al. The emerging biofuel crop *Camelina sativa* retains a highly undifferentiated hexaploid genome structure. *Nature Communications*, 5(1):3706, 2014. 344  
345  
346  
347
- [22] Kerstin Lindblad-Toh, Manuel Garber, Or Zuk, Michael F Lin, Brian J Parker, Stefan Washietl, Pouya Kheradpour, Jason Ernst, Gregory Jordan, Evan Mauceli, et al. A high-resolution map of human evolutionary constraint using 29 mammals. *Nature*, 478(7370):476–482, 2011. 348  
349  
350  
351
- [23] Selina ER Bopp, Micah J Manary, A Taylor Bright, Geoffrey L Johnston, Neekesh V Dharia, Fabio L Luna, Susan McCormack, David Plouffe, Case W McNamara, John R Walker, et al. Mitotic evolution of *Plasmodium falciparum* shows a stable core genome but recombination in antigen families. *PLoS Genetics*, 9(2):e1003293, 2013. 352  
353  
354  
355
- [24] Dorothy E Loy, Weimin Liu, Yingying Li, Gerald H Learn, Lindsey J Plenderleith, Sesh A Sundararaman, Paul M Sharp, and Beatrice H Hahn. Out of Africa: origins and evolution of the human malaria parasites *Plasmodium falciparum* and *Plasmodium vivax*. *International Journal for Parasitology*, 47(2-3):87–97, 2017. 356  
357  
358  
359
- [25] Gavin G Rutledge, Ulrike Böhme, Mandy Sanders, Adam J Reid, James A Cotton, Oumou Maiga-Ascofare, Abdoulaye A Djimdé, Tobias O Apinjoh, Lucas Amenga-Etego, Magnus Manske, et al. *Plasmodium malariae* and *P. ovale* genomes provide insights into malaria parasite evolution. *Nature*, 542(7639):101–104, 2017. 360  
361  
362  
363
- [26] Toshihiro Mita and Kazuyuki Tanabe. Evolution of *Plasmodium falciparum* drug resistance: implications for the development and containment of artemisinin resistance. *Japanese Journal of Infectious Diseases*, 65(6):465–475, 2012. 364  
365  
366

- [27] John W Drake. The distribution of rates of spontaneous mutation over viruses, prokaryotes, and eukaryotes. *Annals of the New York Academy of Sciences*, 870(1):100–107, 1999.
- [28] Michael W Nachman and Susan L Crowell. Estimate of the mutation rate per nucleotide in humans. *Genetics*, 156(1):297–304, 2000.
- [29] Adeolu B Adewoye, Sarah J Lindsay, Yuri E Dubrova, and Matthew E Hurles. The genome-wide effects of ionizing radiation on mutation induction in the mammalian germline. *Nature Communications*, 6(1):6684, 2015.
- [30] Brandon Milholland, Xiao Dong, Lei Zhang, Xiaoxiao Hao, Yousin Suh, and Jan Vijg. Differences between germline and somatic mutation rates in humans and mice. *Nature Communications*, 8(1):1–8, 2017.
- [31] Peter D Keightley, Rob W Ness, Daniel L Halligan, and Penelope R Haddrill. Estimation of the spontaneous mutation rate per nucleotide site in a *Drosophila melanogaster* full-sib family. *Genetics*, 196(1):313–320, 2014.
- [32] Peter D Keightley, Urmi Trivedi, Marian Thomson, Fiona Oliver, Sujai Kumar, and Mark L Blaxter. Analysis of the genome sequences of three *Drosophila melanogaster* spontaneous mutation accumulation lines. *Genome Research*, 19(7):1195–1201, 2009.
- [33] Gordon Irlam. The creation-mutation-selection model: mutation rates and effective population sizes: Supplement 1, 2023. doi:10.5281/zenodo.8080182.
- [34] Stephen F Altschul, Warren Gish, Webb Miller, Eugene W Myers, and David J Lipman. Basic local alignment search tool. *Journal of Molecular Biology*, 215(3):403–410, 1990.
- [35] Saul B Needleman and Christian D Wunsch. A general method applicable to the search for similarities in the amino acid sequence of two proteins. *Journal of Molecular Biology*, 48(3):443–453, 1970.
- [36] Peter JA Cock, Tiago Antao, Jeffrey T Chang, Brad A Chapman, Cymon J Cox, Andrew Dalke, Iddo Friedberg, Thomas Hamelryck, Frank Kauff, Bartek Wilczynski, et al. Biopython: freely available Python tools for computational molecular biology and bioinformatics. *Bioinformatics*, 25(11):1422–1423, 2009.
- [37] Ziheng Yang. PAML 4: phylogenetic analysis by maximum likelihood. *Molecular Biology and Evolution*, 24(8):1586–1591, 2007.
- [38] Gary Benson. Tandem repeats finder: a program to analyze DNA sequences. *Nucleic Acids Research*, 27(2):573–580, 1999.
- [39] Sudhir Kumar, Glen Stecher, Michael Suleski, and S Blair Hedges. Timetree: a resource for timelines, timetrees, and divergence times. *Molecular Biology and Evolution*, 34(7):1812–1819, 2017.
- [40] Adam Eyre-Walker and Peter D Keightley. High genomic deleterious mutation rates in hominids. *Nature*, 397(6717):344–347, 1999.
- [41] Mahendra Mariadassou, Marie Suez, Sanbadam Sathyakumar, Alain Vignal, Mariangela Arca, Pierre Nicolas, Thomas Faraut, Diane Esquerré, Masahide Nishibori, Agathe Vieaud, et al. Unraveling the history of the genus *Gallus* through whole genome sequencing. *Molecular Phylogenetics and Evolution*, 158:107044, 2021.



- [42] Souqi Liao, Wenyan Dong, Hui Zhao, Ruijin Huang, Xufeng Qi, and Dongqing Cai. Cardiac regeneration in *Xenopus tropicalis* and *Xenopus laevis*: discrepancies and problems. *Cell & Bioscience*, 8(1):1–3, 2018. 407  
408  
409
- [43] Barney Reed. Good practice guidance for the housing and care of *Xenopus laevis*. *Animal Technology and Welfare*, 8(3):137, 2009. 410  
411
- [44] Thomas Naert, Dionysia Dimitrakopoulou, Dieter Tulkens, Suzan Demuyneck, Marjolein Carron, Rivka Noelanders, Liza Eeckhout, Gert Van Isterdael, Dieter Deforce, Christian Vanhove, et al. RBL1 (p107) functions as tumor suppressor in glioblastoma and small-cell pancreatic neuroendocrine carcinoma in *Xenopus tropicalis*. *Oncogene*, 39(13):2692–2706, 2020. 412  
413  
414  
415
- [45] Nobuo Egami. Further notes on the life span of the teleost, *Oryzias latipes*. *Aging in Cold Blooded Animals*, page 118, 1974. 416  
417
- [46] Eva Terzibasi Tozzini, Alexander Dorn, Enoch Ng’oma, Matej Polačik, Radim Blažek, Kathrin Reichwald, Andreas Petzold, Brian Watters, Martin Reichard, and Alessandro Cellerino. Parallel evolution of senescence in annual fishes in response to extrinsic mortality. *BMC Evolutionary Biology*, 13(1):1–12, 2013. 418  
419  
420  
421
- [47] Yi Peng Teoh, Mashitah Mat Don, and Salmiah Ujang. Assessment of the properties, utilization, and preservation of rubberwood (*hevea brasiliensis*): a case study in malaysia. *Journal of Wood Science*, 57(4):255–266, 2011. 422  
423  
424
